# Supplementary material
Source: PubMed Central journal article supplement (PMC4911745)
Supplement: MCB.00062-16_zmb999101257so10.pdf [file MCB.00062-16_zmb999101257so10.pdf]

| <b>RNA</b> | <b>Primers</b> | <b>DNA sequence</b>      |
|------------|----------------|--------------------------|
| BCL11A     | forward        | AACCCCAGCACTTAAGCAAACG   |
|            | reverse        | GGCCGTGGTCTGGTTCAT       |
| BCL11B     | forward        | CCCAGAGGGAGCTCATCAC      |
|            | reverse        | ACTTGGCTCCTCTATCTCCAGAC  |
| IL2        | forward        | TGGAGCATTACTGCTGGATTT    |
|            | reverse        | TGTGAGCATCCTGGTGAGTTT    |
| Id2        | forward        | ACCACCCTCAACACGGATAT     |
|            | reverse        | CACACAGTGCTTTGCTGTCATT   |
| MTA1       | forward        | TGCTCAACGGGAAGTCCTACC    |
|            | reverse        | GGCCATGTAGAACACGTCATC    |
| RbAp48     | forward        | TGATGCGTCACACTACGACA     |
|            | reverse        | CTCCTTCATGGTTGATCTTGATT  |
| KLF4       | forward        | AAGGGAGAAGACACTGCGTCAA   |
|            | reverse        | CACTGGGGGAAGTCGCTTCA     |
| CXCR4      | forward        | ACTGGGTTAATGCTTGCTGAAT   |
|            | reverse        | GCCCATTTCTCGGTGTAGTT     |
| 18S        | forward        | GGCGCCCCCTCGATGCTCTTAG   |
|            | reverse        | GCTCGGGCCTGCTTTGAACACTCT |

Table S1 : primers used in qRT-PCR experiments.

| Promoter | Primers | DNA sequence             |
|----------|---------|--------------------------|
| IL2      | forward | AAGGCGTTAATTGCATGAATTAGA |
|          | reverse | AAAGACTGACTGAATGGATGTAGG |
| Id2      | forward | GCCAGCCCCGCACTTACT       |
|          | reverse | GGTTCTTCCGCGTTCGCA       |
| CXCR4    | forward | AACACGAGGATGGCAAGAGA     |
|          | reverse | TGCGGTCTTAAAACGAAGGC     |
| BCL11B   | forward | GCAGAAAACCCAGAAACAACC    |
|          | reverse | ACTTGGGGACTTGTCTCGTACC   |
| GAPDH    | forward | GCGTGCCCAGTTGAACCA       |
|          | reverse | CGCCCGTAAAACCGCTAGT      |

Table S2 : primers used in ChIP-qPCR experiments.
