# Supplementary material
Source: PubMed Central journal article supplement (PMC4911745)

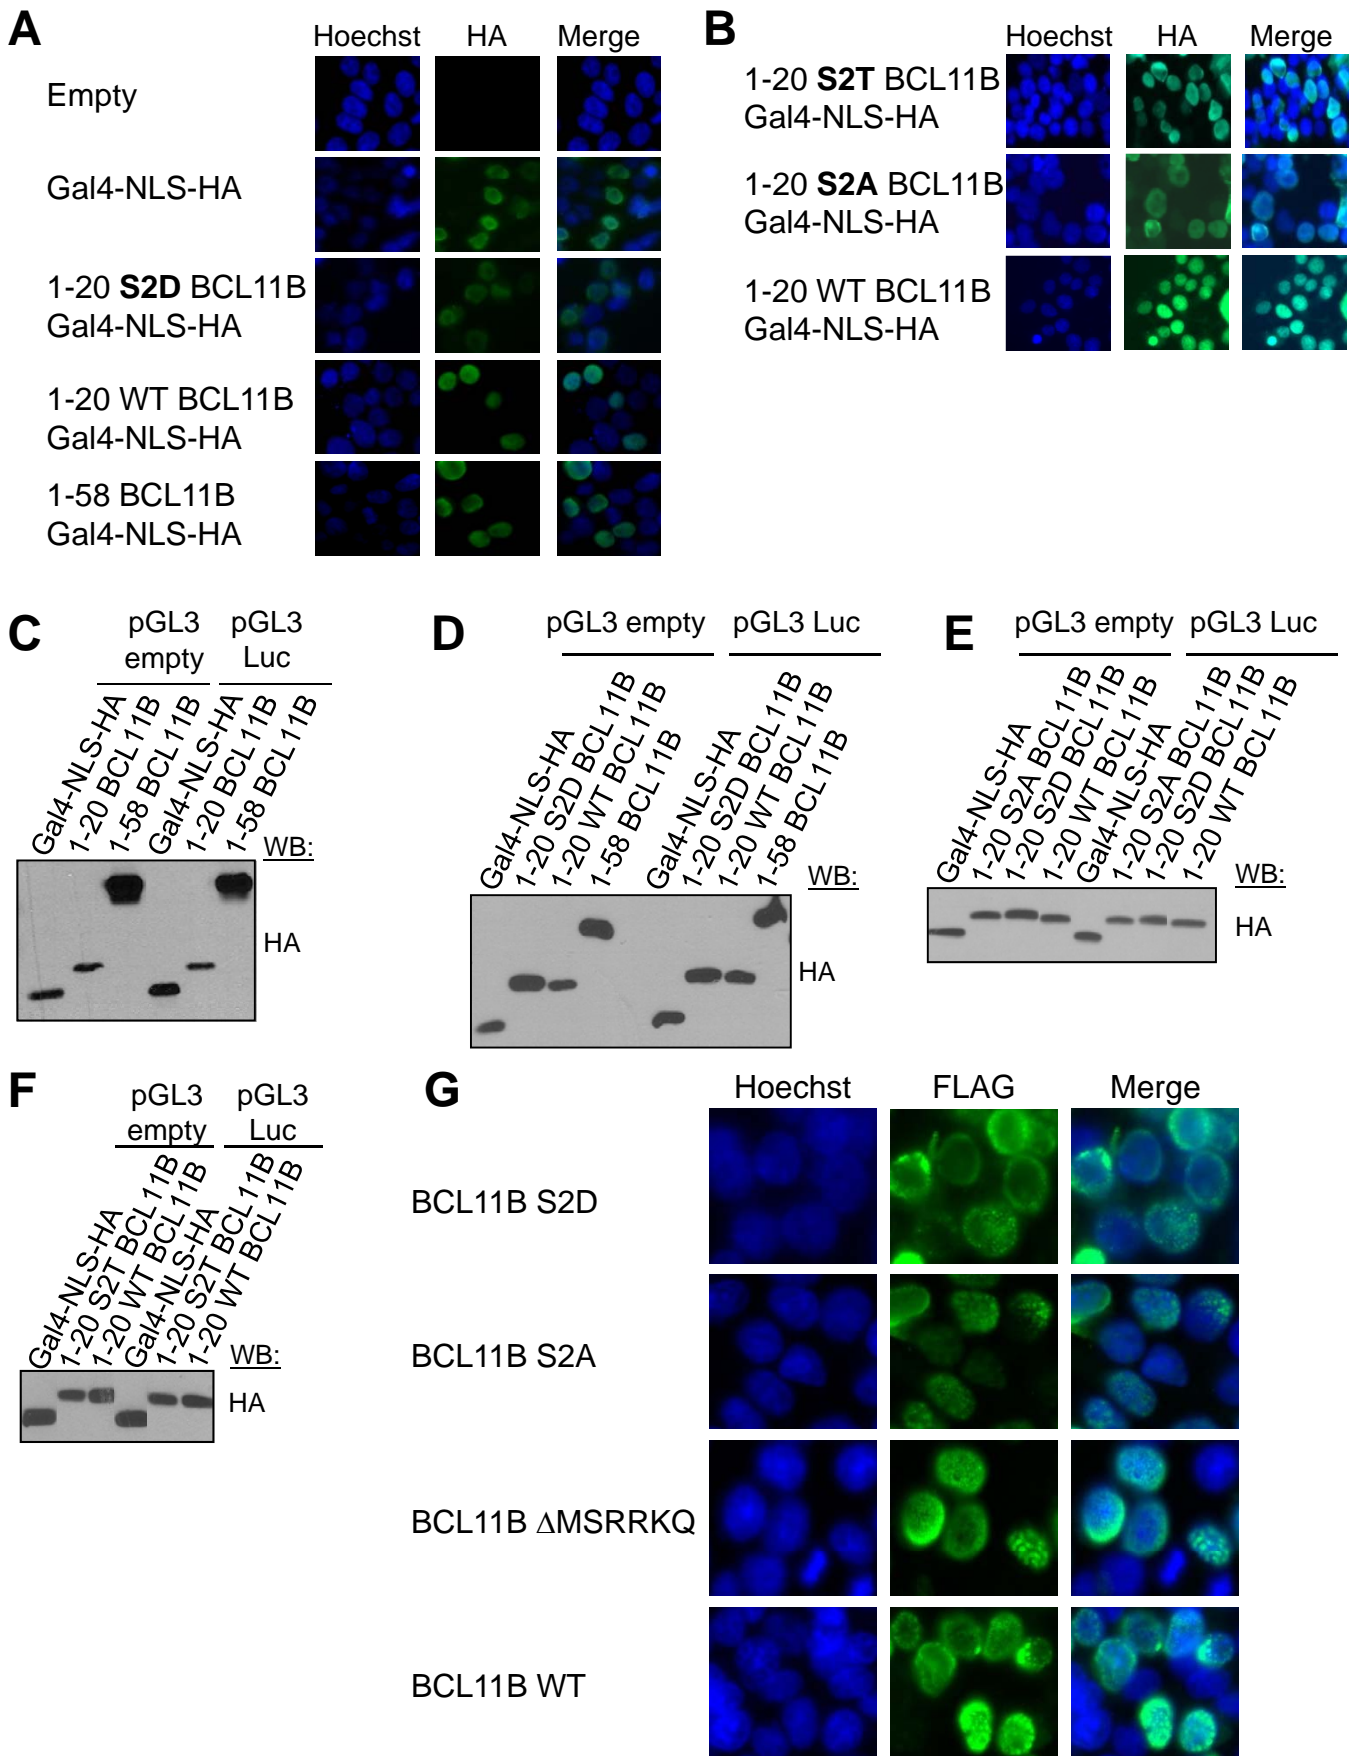

Dubuissez et al., Supplementary Figure 2; Related to Figure 2

Supplement: MCB.00062-16_zmb013161257so3.pdf [file MCB.00062-16_zmb013161257so3.pdf]

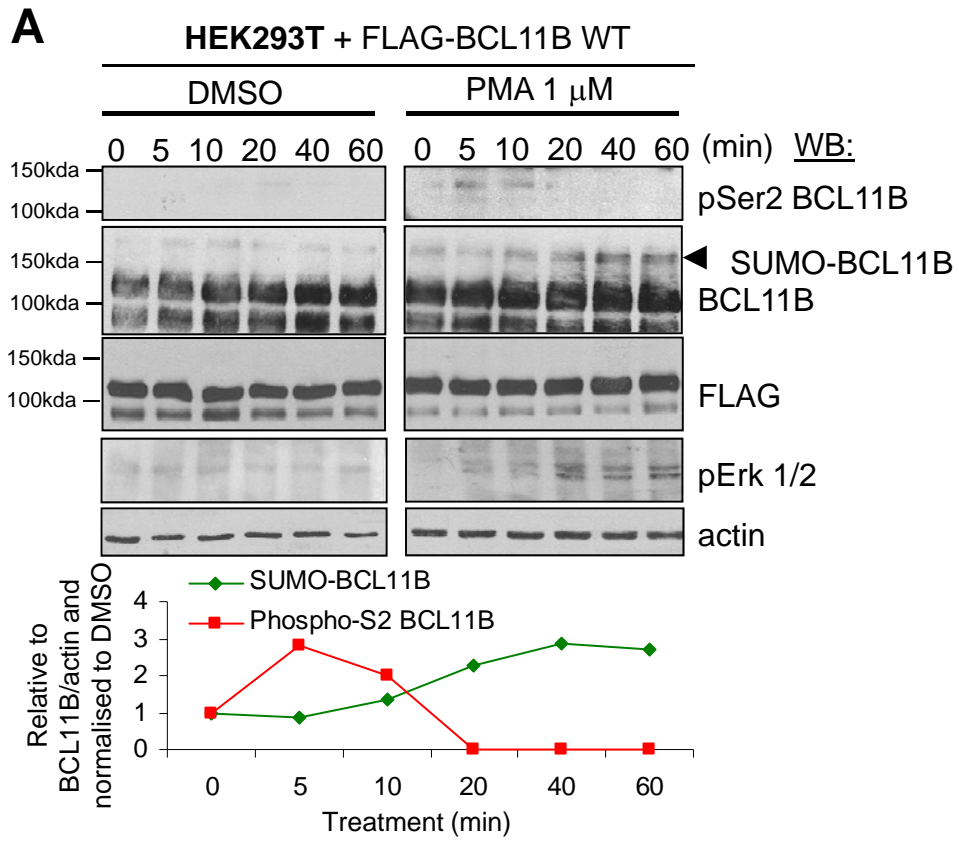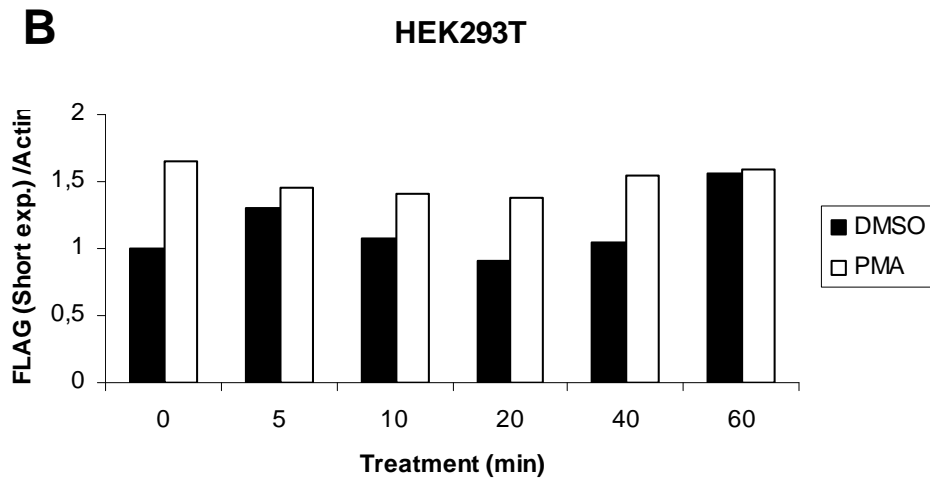

Supplement: MCB.00062-16_zmb999101257so4.pdf [file MCB.00062-16_zmb999101257so4.pdf]

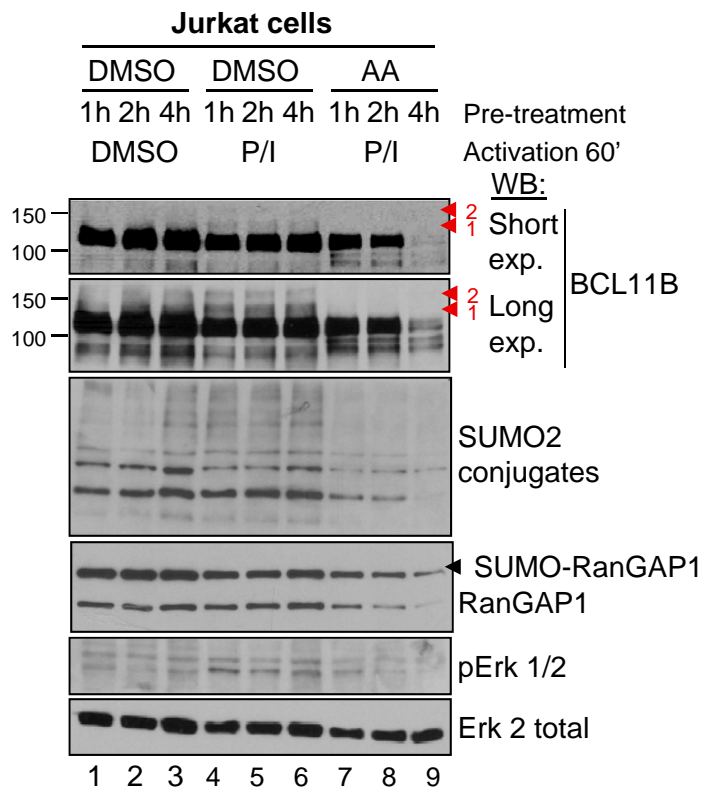

*Dubuissez et al., Supplementary Figure 4; Related to Figure 6*

Supplement: MCB.00062-16_zmb999101257so5.pdf [file MCB.00062-16_zmb999101257so5.pdf]

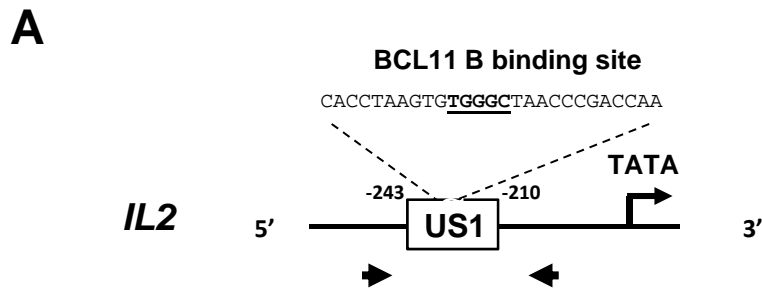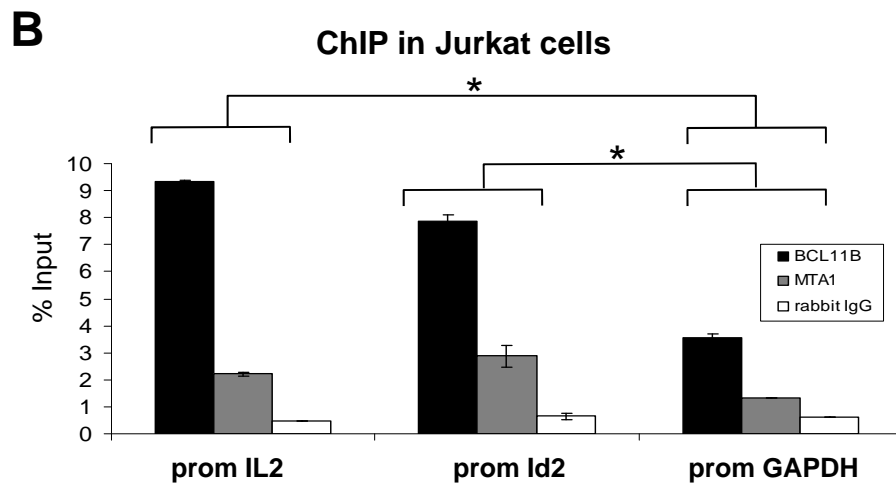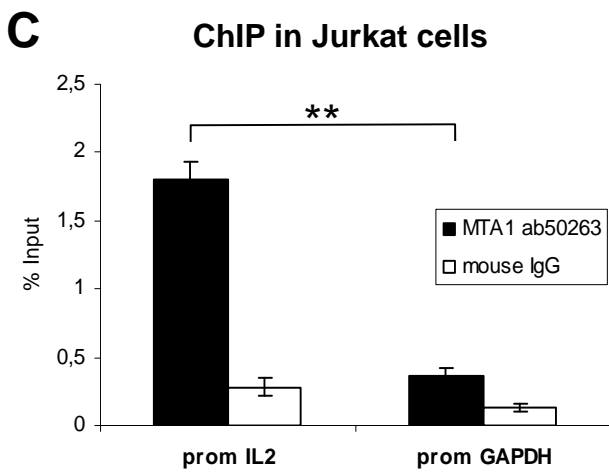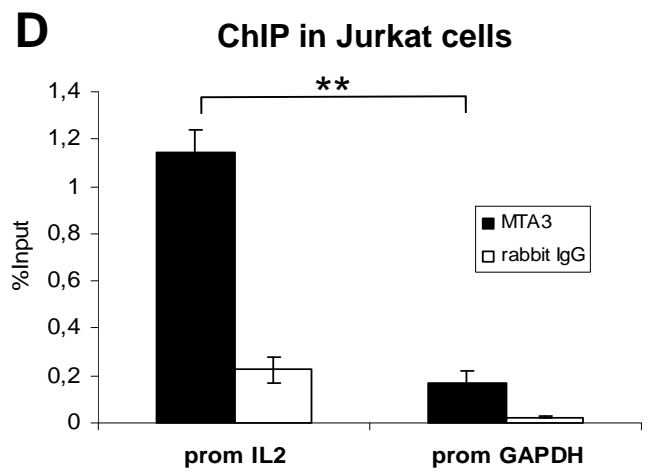

Supplement: MCB.00062-16_zmb999101257so8.pdf [file MCB.00062-16_zmb999101257so8.pdf]
